# Supplementary material
Source: PubMed Central journal article supplement (PMC6965855)
Supplement: ijcep0010-10830-f6.pdf [file ijcep0010-10830-f6.pdf]

## SOST effects in OA

**Table S1.** List of primer names and sequences for q-PCR

| Primer name    | Sequences               |
|----------------|-------------------------|
| Col2a1 upper   | CAGGATGCCCGAAAATTAGGG   |
| Col2a1 lower   | ACCACGATCACCTCTGGGT     |
| Aggrecan upper | CCTGCTACTTCATCGACCCC    |
| Aggrecan lower | AGATGCTGTTGACTCGAACCT   |
| Sox9 upper     | AGTACCCGCATCTGCACAAC    |
| Sox9 lower     | ACGAAGGGTCTCTTCTCGCT    |
| MMP-3 upper    | ACATGGAGACTTTGTCCCTTTTG |
| MMP-3 lower    | TTGGCTGAGTGGTAGAGTCCC   |
| MMP-13 upper   | TGTTTGCAGAGCACTACTTGAA  |
| MMP-13 lower   | CAGTCACCTCTAAGCCAAAGAAA |
| Adamts4 upper  | ATGGCCTCAATCCATCCCAG    |
| Adamts4 lower  | AAGCAGGGTTGGAATCTTTGC   |
| Adamts5 upper  | GGAGCGAGGCCATTACAAC     |
| Adamts5 lower  | CGTAGACAAGGTAGCCCACCTT  |
| Actb upper     | GGCTGTATCCCCTCCATCG     |
| Actb lower     | CCAGTTGGTAACAATGCCATGT  |

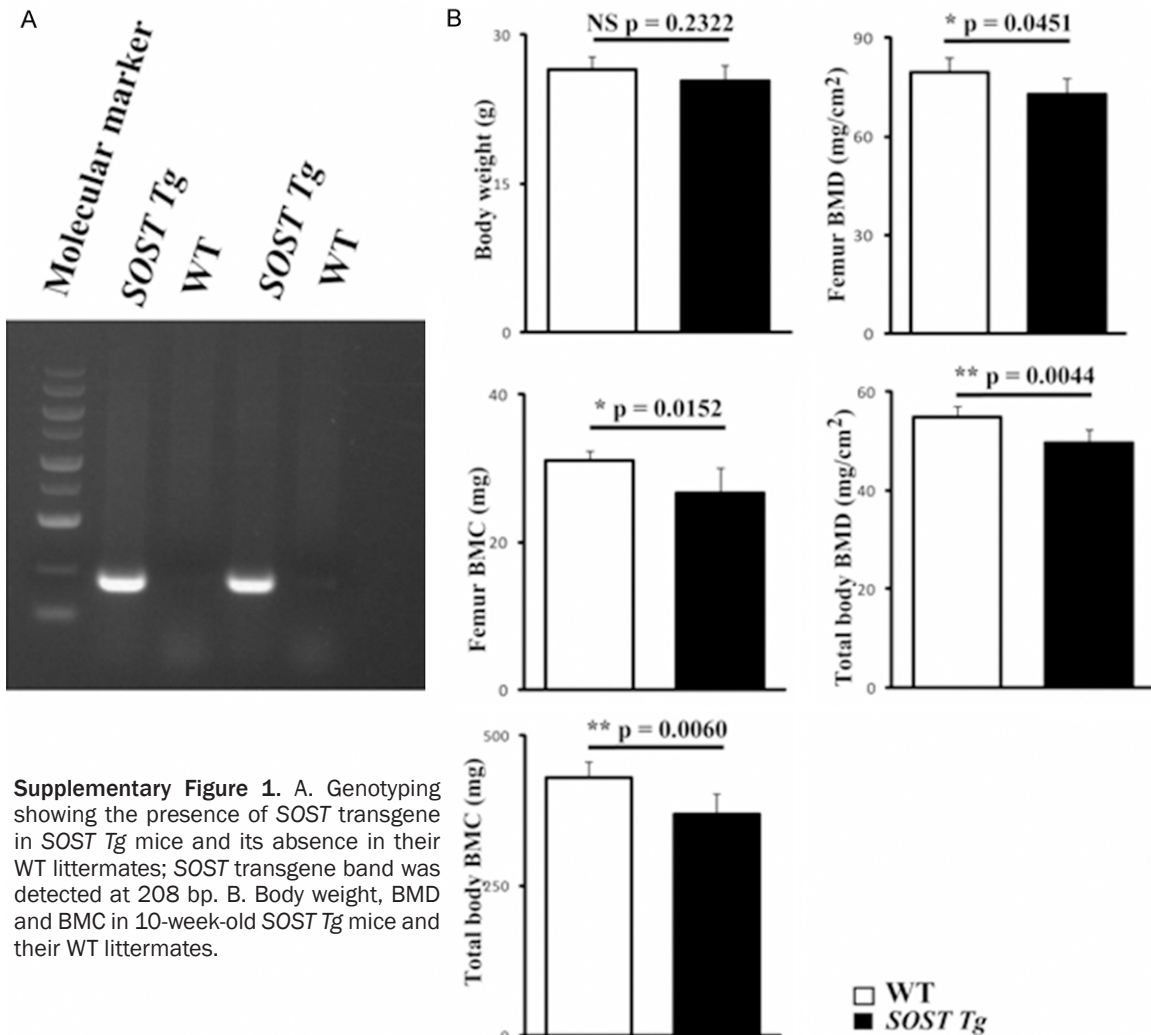

SOST effects in OA

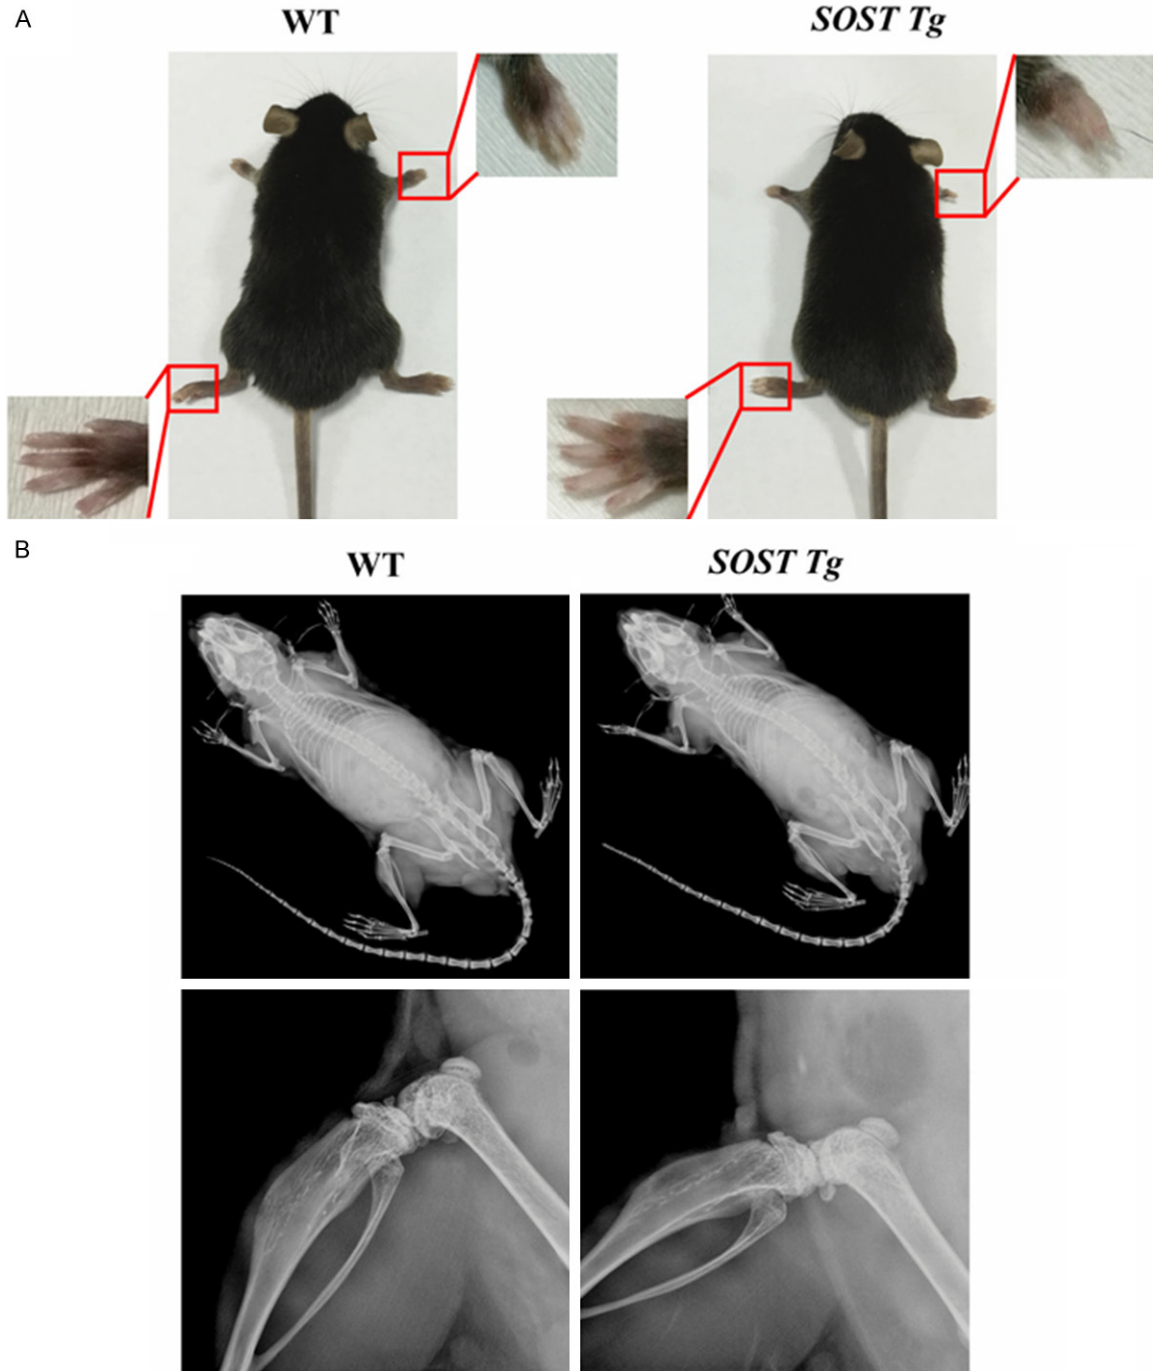

**Supplementary Figure 2.** A. Gross morphology of 10-week-old *SOST Tg* mice and their WT littermates. B. Radiographic assessment of whole body and knee joints in 10-week-old *SOST Tg* mice and their WT littermates.
